# Supplementary material for: Dietary Intake of Adult Residents in Luxembourg Taking Part in Two Cross-Sectional Studies—ORISCAV-LUX (2007–2008) and ORISCAV-LUX 2 (2016–2017)
Source: MDPI journal article supplement (doi:10.3390/nu13124382), 2021-12-07
Supplement: s1 [file s1]

**Supplementary Table S1.** Estimated marginal means of participants' total energy, alcohol, and macronutrient intake.

| Parameter                         | Estimated marginal means (95% CI)* |                         | P-value** |
|-----------------------------------|------------------------------------|-------------------------|-----------|
|                                   | ORISCAV-LUX                        | ORISCAV-LUX 2           |           |
| Total energy intake (kcal/d)      | 3.349 (3.340, 3.358)               | 3.375 (3.367, 3.383)    | <0.001    |
| Total water (g/d)                 | 3.468 (3.460, 3.475)               | 3.482 (3.474, 3.489)    | 0.005     |
| Total protein (g/d)               | 1.941 (1.932, 1.950)               | 1.949 (1.941, 1.958)    | 0.165     |
| Vegetables source protein (g/d)   | 1.427 (1.418, 1.437)               | 1.428 (1.419, 1.437)    | 0.911     |
| Animal source protein (g/d)       | 1.749 (1.738, 1.760)               | 1.767 (1.755, 1.778)    | 0.019     |
| Total Fat (g/d)                   | 1.973 (1.962, 1.983)               | 2.063 (2.054, 2.072)    | <0.001    |
| Saturated fatty acids (g/d)       | 1.509 (1.498, 1.520)               | 1.592 (1.582, 1.602)    | <0.001    |
| Monounsaturated fatty acids (g/d) | 1.597 (1.586, 1.607)               | 1.673 (1.663, 1.682)    | <0.001    |
| Polyunsaturated fatty acids (g/d) | 1.179 (1.168, 1.191)               | 1.323 (1.312, 1.334)    | <0.001    |
| Linoleic acid (g/day)             | 1.092 (1.080, 1.104)               | 1.240 (1.228, 1.252)    | <0.001    |
| Alpha-linoleic acid (g/day)       | 0.041 (0.029, 0.054)               | 0.267 (0.254, 0.280)    | <0.001    |
| Arachidonic acid (g/day)          | -0.812 (-0.825, -0.800)            | -0.724 (-0.737, -0.711) | <0.001    |
| Eicosapentaenoic acid (g/day)     | -0.937 (-0.958, -0.916)            | -0.759 (-0.783, -0.736) | <0.001    |
| Docosapentaenoic acid (g/day)     | -1.225 (-1.240, -1.210)            | -1.130 (-1.147, -1.113) | <0.001    |
| Docosahexaenoic acid (g/day)      | -0.751 (-0.771, -0.731)            | -0.584 (-0.605, -0.563) | <0.001    |
| Cholesterol (mg/d)                | 2.489 (2.478, 2.500)               | 2.549 (2.538, 2.559)    | <0.001    |
| Total carbohydrates (g/day)       | 2.365 (2.355, 2.374)               | 2.336 (2.327, 2.345)    | <0.001    |
| Simple sugars (g/d)               | 2.039 (2.028, 2.051)               | 1.994 (1.983, 2.004)    | <0.001    |
| Added sugars (g/d)                | 1.501 (1.483, 1.519)               | 1.436 (1.418, 1.454)    | <0.001    |
| Starch (g/d)                      | 2.034 (2.023, 2.045)               | 2.012 (2.001, 2.023)    | 0.002     |
| Total fiber (g/d)                 | 1.366 (1.356, 1.375)               | 1.356 (1.347, 1.365)    | 0.118     |
| Soluble fiber (g/d)               | 0.675 (0.665, 0.685)               | 0.662 (0.652, 0.672)    | 0.046     |
| Alcohol (g/d)                     | 0.654 (0.615, 0.693)               | 0.788 (0.756, 0.819)    | <0.001    |

\* Linear mixed model (based on log-transformed data) adjusted for age and gender.

\*\* Benjamini-Hochberg correction was applied to all p-values: All p-values are displayed after this correction.

**Supplementary Table S2.** Estimated marginal means of micronutrient intake of participants.

| Parameter                 | Estimated marginal means (95% CI)* |                       | P-value** |
|---------------------------|------------------------------------|-----------------------|-----------|
|                           | ORISCAV-LUX                        | ORISCAV-LUX 2         |           |
| Vitamin A (µg/day)        | 2.553 (2.399, 2.707)               | 2.621 (2.437, 2.804)  | <0.001    |
| Beta-carotene (µg/day)    | 3.601 (3.451, 3.751)               | 3.649 (3.470, 3.829)  | 0.013     |
| Vitamin D (µg/day)        | 0.381 (0.187, 0.575)               | 0.635 (0.403, 0.867)  | <0.001    |
| Vitamin E (mg/day)        | 1.150 (1.139, 1.161)               | 1.266 (1.256, 1.276)  | <0.001    |
| Vitamin C (mg/day)        | 2.146 (2.016, 2.276)               | 2.182 (2.026, 2.338)  | 0.040     |
| Thiamine (mg/day)         | 0.189 (0.144, 0.235)               | 0.193 (0.139, 0.247)  | 0.726     |
| Riboflavin (mg/day)       | 0.275 (0.235, 0.314)               | 0.268 (0.221, 0.315)  | 0.416     |
| Niacin (mg/day)           | 1.307 (1.212, 1.402)               | 1.333 (1.219, 1.446)  | 0.030     |
| Pantothenic acid (mg/day) | 0.722 (0.713, 0.731)               | 0.767 (0.759, 0.776)  | <0.001    |
| Pyridoxine (mg/day)       | 0.340 (0.331, 0.349)               | 0.378 (0.369, 0.386)  | <0.001    |
| Folate (µg/day)           | 2.523 (2.458, 2.588)               | 2.524 (2.447, 2.602)  | 0.915     |
| Vitamin B12 (µg/day)      | 0.643 (0.499, 0.787)               | 0.699 (0.527, 0.872)  | <0.001    |
| Calcium (mg/day)          | 3.022 (3.013, 3.031)               | 2.970 (2.961, 2.978)  | <0.001    |
| Iron (mg/day)             | 1.141 (1.132, 1.150)               | 1.151 (1.143, 1.159)  | 0.067     |
| Iodide (µg/day)           | 2.159 (2.149, 2.168)               | 2.191 (2.182, 2.199)  | <0.001    |
| Magnesium (mg/day)        | 2.615 (2.587, 2.644)               | 2.573 (2.540, 2.606)  | <0.001    |
| Potassium (mg/day)        | 3.540 (3.510, 3.569)               | 3.543 (3.503, 3.5839) | 0.726     |
| Phosphorus (mg/day)       | 3.134 (3.125, 3.143)               | 3.122 (3.115, 3.130)  | 0.036     |
| Sodium (mg/day)           | 3.511 (3.477, 3.545)               | 3.535 (3.495, 3.750)  | 0.005     |

\* Linear mixed model (based on log-transformed data) adjusted for age and gender.

\*\* Benjamini-Hochberg correction was applied to all p-values: All p-values are displayed after this correction.

**Supplementary Table S3.** Estimated marginal means of food groups' intake of participants.

|                                       | Estimated marginal means (95% CI)* |                      | P-value** |
|---------------------------------------|------------------------------------|----------------------|-----------|
|                                       | ORISCAV-LUX                        | ORISCAV-LUX 2        |           |
| Grains (g/day)                        | 2.282 (2.268, 2.296)               | 2.065 (2.049, 2.081) | <0.001    |
| Fruits (g/day)                        | 2.413 (2.391, 2.435)               | 2.420 (2.402, 2.439) | 0.561     |
| Vegetables (g/day)                    | 2.406 (2.374, 2.439)               | 2.293 (2.256, 2.331) | <0.001    |
| Starchy vegetables (g/day)            | 1.811 (1.599, 2.022)               | 1.862 (1.609, 2.115) | 0.056     |
| Protein rich foods (g/day)            | 2.189 (2.175, 2.203)               | 2.314 (2.301, 2.326) | <0.001    |
| Ready to eat and fast foods (g/day)   | 1.989 (1.796, 2.182)               | 2.020 (1.788, 2.251) | 0.259     |
| Dairy products (g/day)                | 2.321 (2.299, 2.342)               | 2.170 (2.146, 2.193) | <0.001    |
| Lipids (fats & oils) (g/day)          | 1.604 (1.588, 1.621)               | 1.768 (1.754, 1.783) | <0.001    |
| Sugary products (g/day)               | 1.659 (1.468, 1.849)               | 1.578 (1.351, 1.806) | <0.001    |
| - Non-caloric beverages (g/day)       | 3.129 (3.113, 3.144)               | 3.197 (3.186, 3.209) | <0.001    |
| - Sugared-sweetened beverages (g/day) | 2.214 (1.846, 2.583)               | 2.245 (1.802, 2.688) | 0.543     |
| - Alcoholic beverages (g/day)         | 1.883 (1.850, 1.916)               | 1.955 (1.927, 1.983) | <0.001    |

\* Linear mixed model (based on log-transformed data) adjusted for age and gender.

\*\* Benjamini-Hochberg correction was applied to all p-values: All p-values are displayed after this correction.
